# Supplementary material for: Involving Patients in a Multidisciplinary European Consensus Process and in the Development of a ‘Patient Summary of the Consensus Document for Colon and Rectal Cancer Care’
Source: Springer Nature journal article supplement (doi:10.1007/s40271-014-0061-4), 2014-05-26
Supplement: MOESM7 [file 40271_2014_61_MOESM7_ESM.doc]

***Questionnaire:***

***Value of the summary of the consensus conference on colon and rectal cancer***

- Prepared By-

Please, make sure you send your review to [P.G.Boelens@lumc.nl](mailto:P.G.Boelens@lumc.nl), or to [Geoffrey@europacolon.com](mailto:Geoffrey@europacolon.com). We will use your anonymous comments to improve patient information in the future and make cancer care standards more towards your needs.

| Date: | 11 | / | 16 | / | 2013 |
| --- | --- | --- | --- | --- | --- |
|  | MM |  | DD |  | YYYY |

| Location: | Worcester | , | UK |
| --- | --- | --- | --- |
|  | City |  | State |

| Name (optional): | Barbara | Moss |  |
| --- | --- | --- | --- |
|  |  |  |  |

SECTION 1

Patient Experience

Objective

To find out and define the factors of importance to patients with colon and rectal cancer when facing treatment.

***We need to know whether this summary aids patients with colon or rectal cancer. We ask several personal questions to gain more insight in your experiences.***

1. First, can you first please describe me a bit about your experience with colon or rectal cancer? How would you explain it to a family member or friend?
2. I was diagnosed with Stage IV cancer of the ascending colon, spread to the left liver in Nov 2006. I had been working the ay before, misdiagnosed on several occasions. It was devastating. Nobody expects to get cancer, no-matter what the statistics say. Our lives were turned upside down.
3. Could you please describe when you were diagnosed with colon or rectal cancer and what treatments have you received or are proposed or planned for you?
4. I was diagnosed in November 2006.
5. I was told that 'Nothing could be done' for me, only palliative treatment and given a prognosis of 3 to 6 months maximum.
6. I first had oxalyplatin 5FU every 2 weeks. After 4 treatments, the tumour in my liver had grown and was now 15 by 10 cm in size. I was put on to irinotecan 5FU and 6 treatments worked but the effect was diminishing.
7. We read the internet and asked about Avastin and Cetuximab. Was told they were available but would have to pay. We applied for funding to the local PCT (Health Authority) but refused as I was told I was not exceptional, even with letters from my oncologist, surgeon whowas prepared to operate if the tumour shrank, MP, solicitor and myself. We even appealed and I attended and spoke at the appeal. We decided to pay. All my NHS entitlement was taken away. This was a difficult decision for me.
8. The addition of Avastin to my regime worked dramatically and after just 4 treatments, I was able to have a resection of the entire left liver and my ascending colon in one operation.
9. I had 4 adjuvant treatments following but my cancer returned in the lymph when treatment stopped. I the had a course of irinotecan 5FU and this went as quickly as it came! Since then, my CEA has blipped on a few occasions and I have had CT scans but remain in remission for 5 years with no treatment.
10. What treatment information is/was very clear to you? Internet, brochures, by the doctor, by the nurse specialist, by your friends or family.
11. There was a lot of good information on the internet but you had to sort through the bad information to find it. The specialist nurse was fantastic and also the charities, Bowel Cancer UK.
12. Which information in the hospital was not clear enough?
    1. What did you not expect to happen during the treatments?
    2. It was difficult to get good information out of hours. I was once given very misleading information by the out of hours service GP when my cancer returned in the lymph and she told me I had an infection of the throat!
    3. What did you expect to happen during treatments?
    4. I was told very clearly what to expect on the whole. I was disturbed by break through pains and excessive sickness at first. I did have to be rushed into hospital, middle of the night on 3 occasions. Me helped me.aybe if I was more prepared for this, it might hav
13. How, if at all, does colon or rectal cancer affect your life? Please, describe it very practical.
14. *My life, as I knew it, came to an end. I was told, 'you will not work again until you see the back of this'. I retired early at the age of 52.*
15. *I felt very aware of upsetting the lives of my whole family. My husband and his work, my sons at university and their studies.*
16. How, if at all, does colon cancer or rectal cancer affect your daily activities?

- *Physical activity? (e.g., walking, standing)*
- *Constant feeling of excessive tiredness. Sickness.dizziness. Not able to walk or stand for long.*
- *Routine daily activities? (e.g., cooking, cleaning) No cleaning.*
- *Only after a long time was I able to cook. I prepared and cooked the meal over the whole day. Prepared vegetables, onions, rested, cooked in stages.*
- *Leisure activities or hobbies? (e.g., gardening, sitting through a movie) No gardening!*
- *Watching TV was fine but often difficult to concentrate through the length of a movie. Very forgetful.*
- *Self-care activities (e.g., bathing, dressing) My husband was always around as I was prone to fainting in the shower.*
- *Defecation and urinating (stoma) N/A*
- *I always had pains in my stomach and have not been normal in this area (defecating) before or since.No bleeding, though now. I have learned what is normal for me but this would not be normal for anyone else.*
- *Sexual functioning and body image*
- *For me, nothing about my appearance mattered, only life mattered and I was happy for every day. Sexual activities? I felt too ill for this during my whole treatment (2 years). Even after treatment, I had to have medication, Vagisil,to eliminate the pain.*
- *Sleep (e.g., Falling asleep? Staying asleep? Overall sleep quality?)*
- *Excessive sweating disturbed all my sleep. I had to sleep on a towel and change this twice a night as it was soaking wet. I did try to sleep every afternoon too.*

1. How, if at all, does colon cancer or rectal cancer affect your social life?

- *Personal relationships (e.g., friends, family)?*
- *Social activities?*
- *Some people stay away as they do not know what to say to you. Others are upset and you want to cheer them up! I was cheerful and tried to laugh as much as I could when I had company.*
- *Outings were limited, very limited. We really only went to see family apart from hospital visits.*

1. How, if at all, does colon cancer or rectal cancer affect your work (or school)?

- *Work performance? I put the effort into this.*
- *Absenteeism? No, but it was tough.*
- *Motivation? I was there because I wanted to be. Was given the option for time off but refused it.*
- *Once I knew I had CRC, I had to stop work overnight.*
- *Leading up to diagnosis, I only had one day off for an appointment.My classroom was moved to ground floor as I had difficulty climbing stairs.*

1. How does having colon cancer or rectal cancer make you feel, emotionally?

- *Anxious? Sometimes*
- *Worried? Sometimes*
- *Depressed? Not really*
- *Angry? No*
- *Frustrated?When you want to do what you can't*
- *Other? I had peace of mind really. I accepted my illness but I was determined to do all I could to win the battle.*
- *Sometimes you feel helpless.*
- *None?*

SECTION 2

Review of the questionnaire

Objective

To evaluate the Questionnaire

***We would like to have you look at the questionnaire and let me know if any of the items listed on the questionnaire are relevant to your condition.***

1. Are any items listed in the questionnaire relevant to you? Please explain.
2. Yes. I could identify with much of what is said and asked in the questionnaire. All of it really.
3. Are any items listed in the questionnaire difficult for you to understand? Please explain.
4. No. it is clear and east to understand. As you state, colon cancer is personal and the experience is equally so. It is difficult to find a question that is general to all.
5. I must say that my experience has enhanced my life as I can clearly see what is now important to me and I devote time to this. Patient advocacy. I have met so many wonderful people in this role and it is so rewarding.
6. Would you change or reword any of the items listed in the questionnaire? Please explain.

Maybe add a section on how the experience has affected the patient's life.

**Section 3**

**Debriefing Form of Summary**

**EURECCA Summary Questionnaire**

**Please read instructions: Q1-4 are general sections, Q5-Q17 are on colon cancer, Q18- Q31 are on rectal cancer, Q32 to are on distant metastases.**

| **Question** | **I understood this question**  **(Y/N)** | **I did not understood this section/paragraph**  **(Y/N)** | **I would change or reword this section/paragraph (Y/N)** | **Notes/comments** |
| --- | --- | --- | --- | --- |
| **Q1.** Introduction | Y |  |  | Really clear |
| **Q2.** Background | Y |  |  | Easy to understand |
| **Q3.** Screening | Y |  |  | Clear |
| **Q4.** Hereditary colorectal cancer | Y |  |  | I learnt a lot from this |
| **Q5.** Diagnostics in colon cancer | Y |  |  | This info would have helped me in 2006 |
| **Q6.** Staging in colon cancer | Y |  |  | Very interesting & useful to know |
| **Q7.** Flow chart colon cancer imaging | Y |  |  |  |
| **Q8.** Pathology in colon cancer | Y |  |  | Useful recommendation |
| **Q9.** Surgery – colon cancer | Y |  |  | Did not know all this |
| **Q10.** Fast track surgery | Y |  |  | Not widely known |
| **Q11.** Emergency surgery | Y |  |  | I had blockage but it cleared in hospital |
| **Q12.** Treatment of colon cancer per stage  Recommendation for T1 N0 M0 colon cancer | Y |  |  | Ver useful list and definitely useful to know. |
| **Q13.** Recommendation for T2 N0 M0 colon cancer | Y |  |  | All clear |
| **Q14.** Recommendation for T3- T4, N0 colon cancer | Y |  |  | Yes clear. |
| **Q15.** Recommendation for any pT, pN1-2, M0 colon cancer | Y |  |  |  |
| **Q16.** Flow chart colon treatment | Y |  |  |  |
| Q17. Follow up | Y |  | For me, no follow-up colonoscopy as risky because of my operation. CT csans instead. |  |
| Q18. Diagnostics in rectal cancer | Y |  |  | I understood this whole section clearly. |
| Q19. Flow chart rectal cancer imaging | Y |  |  |  |
| Q20. Staging rectal cancer | Y |  |  |  |
| **Q21.** Determining the nodal stage (N) | Y |  |  |  |
| Q22. Determining the metastatic stage (M) | Y |  |  |  |
| Q23. Pathology in rectal cancer | Y |  |  |  |
| Q24. Laparoscopy in rectal cancer | Y |  |  |  |
| Q25. Treatment for early stage rectal cancer | Y |  |  |  |
| Q26. Flow chart | Y |  |  | All good and clear |
| Q27. T3 treatment | Y |  |  |  |
| Q28. Positive margin | Y |  |  |  |
| Q29. Node positive | Y |  |  |  |
| Q30. T4 | Y |  |  |  |
| Q31. Follow up | Y |  |  |  |

|  |  |  |  |
| --- | --- | --- | --- |
|  |  |  |  |
